# Fire impacts tropical communities of soil fungi through changes to plant community composition, litter and soil chemistry

1 Jed Calvert<sup>1,2</sup>, Alistair McTaggart<sup>1</sup>, Lília C. Carvalhais<sup>1</sup>, André Drenth<sup>1</sup>, Roger Shivas<sup>1</sup>

2 <sup>1</sup> *Centre for Horticultural Science, Queensland Alliance for Agriculture and Food Innovation, The University of*  
3 *Queensland, Ecosciences Precinct, 41 Boggo Rd Dutton Park, Queensland 4102, Australia*

4 <sup>2</sup> *Corresponding author at: Centre for Horticultural Science, Queensland Alliance for Agriculture and Food*  
5 *Innovation, The University of Queensland, Ecosciences Precinct, 41 Boggo Rd Dutton Park, Queensland 4102,*  
6 *Australia. E-mail address: [j.calvert@uq.net.au](mailto:j.calvert@uq.net.au) (J. Calvert).*

## 7 Abstract

8 Fire has been predicted to be more severe and frequent in forests of the Australian Monsoon  
9 Tropics over the coming decades. The way in which groups of ecologically important soil fungi  
10 respond to disturbance caused by fire has not been studied in tropical forest ecosystems.  
11 Ectomycorrhizal (EM) fungi are important tree symbionts and saprotrophic fungi drive soil  
12 nutrient cycles. We analysed both publicly-available environmental DNA sequence data as well as  
13 soil chemistry data to test a hypothesis that fire events (1970 - 2017) in a contiguous tropical  
14 forest have altered the composition and diversity of EM and saprotrophic soil fungi. We tested this  
15 hypothesis by measuring community-level taxonomic composition, fungal diversity, species  
16 richness and evenness. We determined whether changes in fungal communities were associated  
17 with fire-altered soil chemical/physical properties, vegetation types, or the direct effect of fire.  
18 Soil fungi differed in abundance and community phylogenetic structure between forest sites that  
19 had experienced fire, and those sites dominated by unburned forest. Communities of EM fungi  
20 were structurally altered by fire at shallow soil horizons, as well as by vegetational changes  
21 between burned and unburned sites at deeper soil horizons. In contrast, fires influenced  
22 community composition of saprotrophic fungi by changing soil nutrient levels and altering litter  
23 composition. Pyrophilic, truffle-like EM fungi that rely on mycophagous mammals for dispersal  
24 were abundant at recently burned sites. We conclude that fire impacts EM fungi primarily by

25 changing plant communities, whereas fire impacts saprotrophic fungi by reducing soil nutrient  
26 levels and altering litter composition.

## 27 Graphical abstract

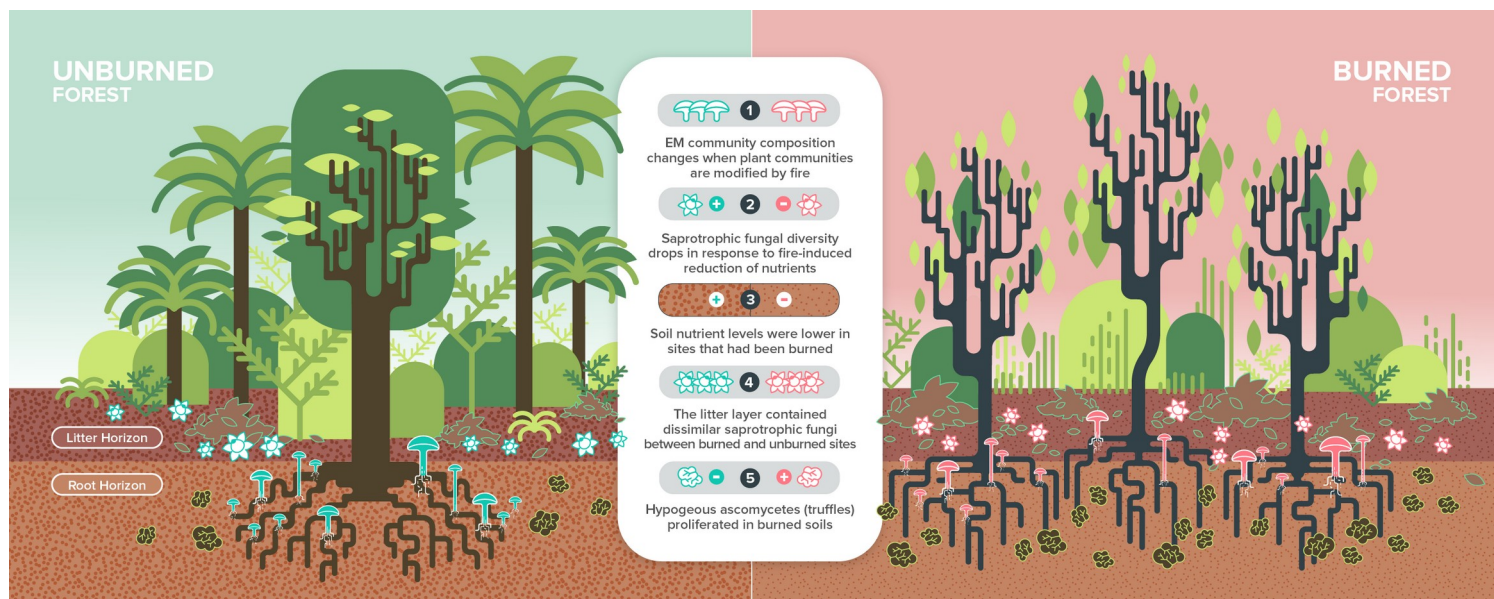

Credit: Sofia Houghton (2-column fitting image. Color to be used in print.)

## 28 Keywords

29 Soil, fungi, fire, ectomycorrhizal, saprotrophic, trophic, tropical, diversity, disturbance

## 30 1. Introduction

31 Soils contain some of the most complex and understudied ecosystems in terrestrial biomes,  
32 providing habitat for an estimated 25 % of described species (Decaëns et al., 2010). Most of the  
33 terrestrial carbon on Earth is in soils (Crowther et al., 2016), and they have been designated a  
34 ‘third biotic frontier’ after deep-sea benthic regions and tropical rainforest canopies (Hågvær,  
35 1998). Healthy soil ecosystems are undergirded by diverse communities of microorganisms  
36 dominated by fungi, bacteria, archaea and other eukaryotes, the taxonomy and function of which  
37 are largely unknown (Baldrian, 2019). Together, the microorganisms of this ‘living terrestrial skin’  
38 drive global biogeochemical cycles and power terrestrial ecosystems (Tecon and Or, 2017).

Fire is a major driver of disturbance in tropical forests (Silvério et al., 2019), including the Australian Monsoon Tropics (AMT), which is the most fire-prone region in Australia (Bowman et al., 2010). In the AMT, fire frequently intrudes from savanna into notophyll plant communities and initiates a process of post-fire seral development (Bowman, 2009; Cole et al., 2014). In this region, fire is a primary determinant of plant distribution, which in turn can influence the structure of microbial communities (Ettema and Wardle, 2002; Ondei et al., 2016; Sarmiento et al., 2017). An increase in fire frequency, severity and duration in the AMT is likely over the next decades due to anthropogenic climate change (Hubnerova et al., 2020).

Specific functional guilds of microorganisms respond differently to fire according to their trophic modes. The resilience of tropical ectomycorrhizal (EM) fungi after fire has been attributed to their ability to draw nutrients from plants (Alem et al., 2020). Fires impact soil microorganisms through changes in soil pH, water holding capacity, and availability of organic carbon, nitrogen and phosphorus (Pellegrini et al., 2019; Singh, 1994; Verma and Jayakumar, 2018). Soil enzyme activity, which reflects microbial metabolism in soil communities, also decreases immediately following fires, especially at shallow soil horizons (Certini et al., 2021). How different functional guilds of fungi respond to fire in a single tropical soil ecosystem has not been studied.

Saprotrophic and EM fungi are two functional guilds of fungi in tropical forests that break down soil organic matter (SOM) (Fernandez and Kennedy, 2016). Gadgil and Gadgil (1975, 1971) proposed that competition and inhibition between saprotrophic and EM fungi suppress the decomposition of organic matter and increase the accumulation of organic carbon. Studies in northern-hemisphere coniferous ecosystems based solely on post-fire observations of macrofungal sporocarps are inconclusive, reporting lower EM diversity (Owen et al., 2019), higher saprotroph diversity and proliferation of rare pyrophilous species (Salo et al., 2019). Similar studies on the effect of fire on communities of saprotrophic and EM fungi in tropical forests have not been made.

We used data from culture-independent high-throughput sequencing of soils provided by the Biomes of Australian Soil Environments soil microbial diversity database to test the hypothesis that fire events (1970 - 2017) in a contiguous tropical forest have altered the composition and diversity of EM and saprotrophic soil fungi. BASE maps Australia's soil microbial diversity using culture-independent high-throughput DNA sequencing (Bissett et al., 2016). We measured community-level taxonomic composition, diversity, species richness and evenness. We determined whether observed changes were associated with the burn status (burned/unburned) of a site, the recency of a fire, and whether these changes were a result of altered soil chemical/physical properties or vegetation type due to fire. Understanding the response of soil microbe communities to fire in the AMT may provide management options for the protection of ecosystems under a changing climate.

## **2. Materials and methods**

### *2.1. Study site*

The Iron Range on Cape York Peninsula, Far North Queensland, is a mountainous coastal region of the Australian Monsoon Tropics (AMT) dominated by tropical rainforest and notophyll vine forest (Neldner and Clarkson, 1995; Webb, 1959). Sample sites for this study were selected to represent a spectrum of seral stages, from unburned to recently burned (*Table 1*).

### *2.2. Sampling BASE data*

We downloaded 42 fungal amplicon community profiles from unburned and burned sites from the Biomes of Australian Soil Environments microbial diversity database (BASE), which were sampled and sequenced according to Bissett et al. (2016). The BASE project took soil samples of 1 kg from the litter (0–10 cm) and mineral soil (20–30) in February 2017. Soil chemical/physical properties including ammonium (NH<sub>4</sub>), nitrate (NO<sub>3</sub>), phosphorus (P), potassium (K), organic carbon (C), calcium (Ca) and pH were analysed and DNA was extracted

88 from samples as per protocols of the Earth Microbiome Project  
89 (<http://www.earthmicrobiome.org/emp-standard-protocols/dna-extraction-protocol/>). The ITS1  
90 region of fungal ribosomal DNA was amplified with the primers ITS1F and ITS4 (Gardes and  
91 Bruns, 1993; White et al., 1990) and sequenced with 300 bp paired-end chemistry on an Illumina  
92 MiSeq.

93 **Table 1** Study sites, fire history and floristic composition. (2-column fitting table.)

| Site | Fires ceased      | Vegetation type                           | Dominant trees                                                                                                                                 | Dominant grasses                                          |
|------|-------------------|-------------------------------------------|------------------------------------------------------------------------------------------------------------------------------------------------|-----------------------------------------------------------|
| 1    | 2017              | Grassy woodland                           | <i>Corymbia intermedia</i> , <i>Lophostemon suaveolens</i> , <i>Acacia flavescens</i>                                                          | <i>Heteropogon contortus</i> , <i>Imperata cylindrica</i> |
| 2    | 1995, one in 2014 | Shrubland                                 | <i>Dodonaea viscosa</i>                                                                                                                        | None                                                      |
| 3    | 1970, one in 2006 | Regenerating closed canopy forest         | <i>Dillenia alata</i> , <i>Buchanania arborescens</i> , <i>Guioa acutifolia</i> , <i>Blepharocarya involucrigera</i>                           | <i>Cryptococcum oxyphyllum</i> , <i>Entolasia stricta</i> |
| 4    | 1970              | Regenerating closed canopy forest         | <i>Atractocarpus sessilis</i> , <i>Buchanania arborescens</i> , <i>Acacia midgleyi</i>                                                         | None                                                      |
| 5    | 1970              | Regenerating closed canopy forest         | <i>Phyllanthus praelongipes</i> , <i>Mallotus resinous</i> , <i>Mallotus polyadenos</i> , <i>Rinoria bangalensis</i>                           | None                                                      |
| 6    | Unburned          | Regenerating closed canopy forest         | <i>Nauclea orientalis</i> , <i>Buchanania arborescens</i> , <i>Vitex heligiton</i>                                                             | None                                                      |
| 7    | Unburned          | Semi-deciduous mesophyll/notophyll forest | <i>Tetrameles nudiflora</i> , <i>Cordia dichotima</i> , <i>Canarium australicum</i> , <i>Lagerstroemia archeriana</i> , <i>Vitex heligiton</i> | None                                                      |
| 8    | Unburned          | Semi-deciduous mesophyll/notophyll forest | <i>Cordia dichotima</i> , <i>Tetrameles nudiflora</i> , <i>Berrya javanica</i> , <i>Paraserianthes toona</i> , <i>Mimusops elengi</i>          | None                                                      |
| 9    | Unburned          | Semi-deciduous mesophyll/notophyll forest | <i>Tetrameles nudiflora</i> , <i>Blepharocarya involucrigera</i> , <i>Alstonia scholaris</i> , <i>Aleurites moluccana</i>                      | None                                                      |
| 10   | Unburned          | Wet rainforest                            | <i>Terminalia complanata</i> , <i>Palaquium galactoxylum</i> , <i>Garcinia dulcis</i> , <i>Syzygium pseudofastigiatum</i>                      | None                                                      |
| 11   | Unburned          | Wet rainforest                            | <i>Aleurites moluccana</i> , <i>Neonauclea glabra</i> , <i>Canarium australicum</i> var. <i>australicum</i> , <i>Archidendron hirsutum</i>     | None                                                      |

### 94 2.3. Processing of sequence data

95 ITS1 reads were identified and extracted with ITSx v1.1.3 (Bengtsson-Palme et al., 2013).  
96 Quality filtering and construction of operational taxonomic unit (OTU) tables were performed in

QIIME2 v2020.11 (Bolyen et al., 2018) with the `dada2` `denoise-single`, `phylogeny align-to-tree-mafft-fasttree`, `diversity core-metrics-phylogenetic` and `feature-classifier classify-sklearn` functions. OTUs were generated from sequences with 97 % similarity, and taxonomy was assigned using the UNITE v8.2 fungal database (Abarenkov et al., 2010). Fungal community diversity was calculated from the ITS dataset rarefied to 5,000 sequences per sample, based on rarefaction curves of Shannon's diversity index.

## 2.4. Statistical analyses

Soil chemistry data for each site were analysed to establish whether nutrient content was correlated between samples exposed to fire at different time points and fungal community structure. A distance matrix of nutrient profiles for each site was constructed in R v3.6.3 (R Core Team, 2020) based on Bray-Curtis dissimilarities (Bray and Curtis, 1957) with the function `vegdist` in `Vegan` v2.5-6 (Oksanen et al., 2020) and visualized with non-metric multidimensional scaling (NMDS) (function `metaMDS`). Soil chemical/physical properties were analysed for  $\text{NH}_4$ ,  $\text{NO}_3$ , P, K, C, Ca and pH. To establish whether fire history and other factors structured soil fungal communities, we constructed distance matrices from OTU tables based on unweighted UniFrac (Lozupone and Knight, 2005), which measures OTUs in terms of their phylogenetic relatedness and presence or absence between samples. We built PERMANOVA (`adonis`) forward models in R to assess variance between categorical variables related to soil chemical/physical properties and determine the significance and hierarchy of influence for sample depth, burn status (burned/unburned), vegetation type (shrubland, grassy woodland, regenerated closed canopy forest, semi-deciduous notophyll forest, wet rainforest), year of most recent fire and year of cessation of frequent fires. We visualized Bray-Curtis distances based on soil chemical/physical properties at each sample site with NMDS (`metaMDS`) in `Vegan` to assess differences between fungal communities in terms of soil chemical/physical properties.



Sequences that represented ectomycorrhizal and saprotrophic fungi were identified with the FUNGuild v1.1 (Nguyen et al., 2016) Python script on an ITS OTU table rarefied to 5,000 sequences and with singletons removed. Only ‘probable’ and ‘highly probable’ assignments were retained. To detect linear correlations between sample alpha diversity and soil chemical/physical properties, we generated Shannon’s diversity (entropy) values (Shannon, 1948) for all samples in QIIME2 (`qiime diversity alpha`) and Pearson’s correlation coefficient, which measures the strength of a linear relationship between two variables, with `rcorr` in the R package `Hmiscv4.4-2` (Harrell, 2021). We used redundancy analysis (RDA) in R with the package `GGORD` (Beck, 2017) to extract and summarise the variation in response variables (sample fungal community composition, individual taxa) and explanatory variables (burn status, soil chemical/physical properties) based on Hellinger-transformed OTU tables to give lower weights to rare taxa. `Krona` v2.7.1 (Ondov et al., 2011) was used to visualise the proportional taxonomic composition of fungal communities.

### 3. Results

#### 3.1. Sequence data

After DADA2 quality filtering in QIIME2, we retained 722,732 ITS sequences from 42 samples, which clustered into a total of 6960 fungal OTUs, from which we identified 165 EM and 654 saprotrophic taxa.

#### 3.2. Soil chemistry

PERMANOVA indicated that sample depth ( $P=0.001$ ) and burn status, i.e. whether or not a site had been burned ( $P = 0.012$ ) had the most influence on fungal communities (*Table 2*). Interactions between variables were associated with differences in soil chemistry. Depth interacted with burn status ( $P = 0.001$ ), vegetation type ( $P = 0.001$ ), year of cessation of frequent fires ( $P = 0.010$ ) and year of last fire ( $P = 0.010$ ). NMDS showed that samples clustered primarily with

sample depth and burn status (*Figure 1*). The greatest variability in soil chemistry was in outlier samples from unburned mesophyll/notophyll rainforest.

**Table 2** PERMANOVA of relative influence on soil chemical/physical properties of sampling depth, burn status (burned/unburned), vegetation type (shrubland, grassy woodland, regenerating closed canopy forest, semi-deciduous notophyll forest, wet rainforest), year of most recent fire and year of cessation of frequent fires. Sampling depth and burn status were important factors associated with differences in soil chemistry between sites. (*Single-column fitting table.*)

|                                            | <i>Df</i> | <i>F model</i> | <i>R</i> <sup>2</sup> | <i>P</i>     |
|--------------------------------------------|-----------|----------------|-----------------------|--------------|
| <b>Depth</b>                               | 1         | 26.5986        | 0.352                 | <b>0.001</b> |
| <b>Burn status (burned/unburned)</b>       | 1         | 6.5186         | 0.086                 | <b>0.012</b> |
| <b>Vegetation type</b>                     | 4         | 1.0067         | 0.053                 | 0.410        |
| <b>Year of most recent fire</b>            | 2         | 0.0288         | 0.001                 | 0.979        |
| <b>Year of cessation of frequent fires</b> | 2         | 0.0288         | 0.001                 | 0.980        |

### 3.3. *Fungal community diversity and effects of soil nutrient levels*

Shannon's diversity index (entropy) was higher for saprotrophic fungi than EM fungi (*Figure 2*), particularly in the litter layer (0–10 cm) at unburned forest sites. Shannon's diversity index of saprotrophic fungi correlated linearly with all measurements of soil physical/chemical properties. Diversity of EM communities correlated only with NH<sub>4</sub> (*Table 3*). In general, NO<sub>3</sub>, P, Ca and pH were higher in unburned than in burned sites. Increased diversity of saprotrophic fungi correlated with levels of soil NH<sub>4</sub>, NO<sub>3</sub>, P, K and Ca, and there was a marginally significant correlation with pH. Lower diversity of EM communities at several unburned sites was associated with elevated soil nutrient levels relative to burned sites, although this trend was less evident for K levels (*Figure 3*). At unburned sites, saprotrophs were more diverse at 0–10 cm depth if levels of NO<sub>3</sub>, P, K and Ca were elevated. Saprotrophic diversity was more variable at 20–30 cm depth, where nutrient levels were lower.



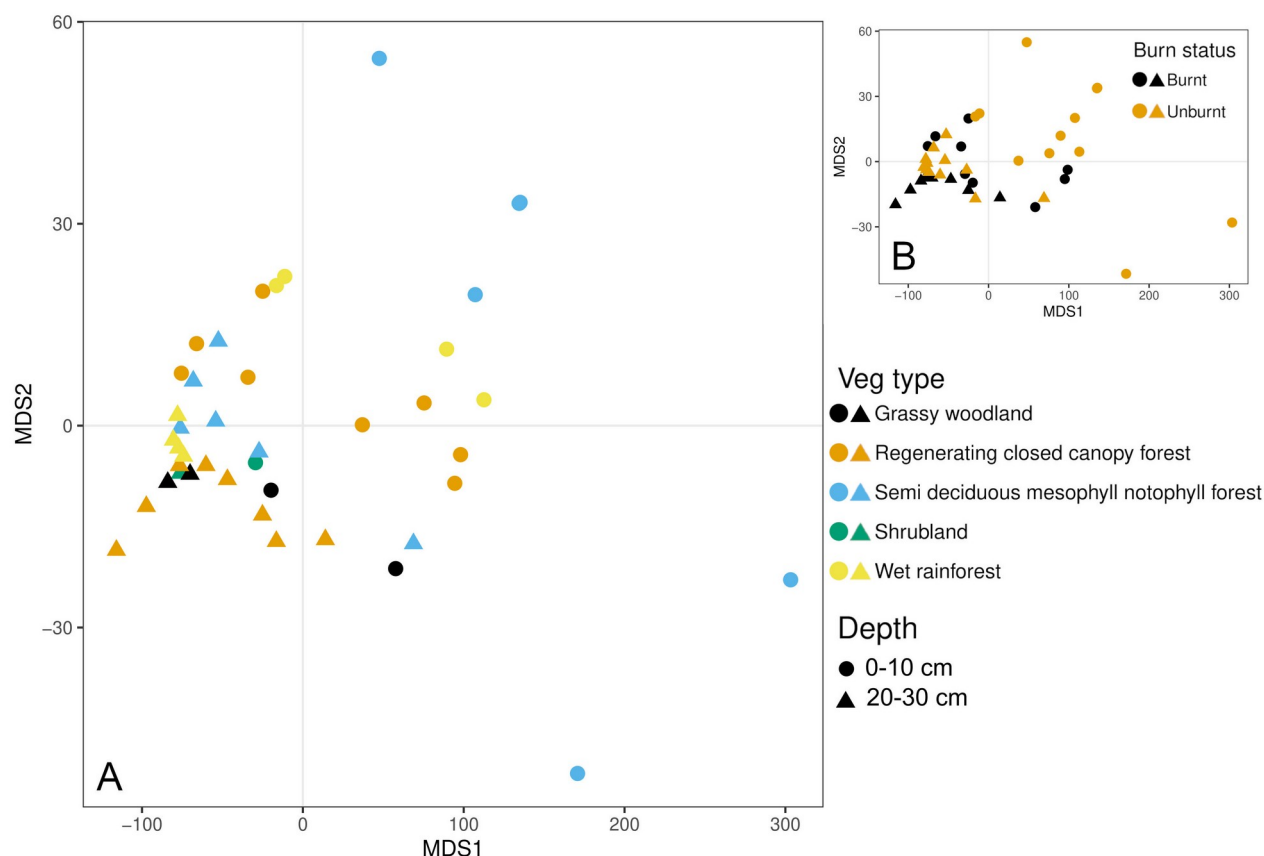

**Figure 1** Non-metric multidimensional scaling showing differences between soil chemistry of samples from sites with different vegetation types and burn status (burned/unburned). Based on a Bray-Curtis distance matrix of nutrient variables for soils at each site including ammonium ( $\text{NH}_4$ ), nitrate ( $\text{NO}_3$ ), phosphorus (P), potassium (K), organic carbon (C), pH and calcium (Ca). Samples clustered primarily according to sampling depth (A) and burn status (B). The greatest variability in terms of soil chemistry was in outlier samples from unburned mesophyll/notophyll rainforest. (1.5-column fitting image. Color to be used in print.)

**Table 3** Pearson's correlation coefficient testing linear relationships between Shannon's diversity (entropy) of soil fungal communities and soil chemical/physical properties. P values <0.05 indicated by bold type. Diversity values for EM fungi correlated linearly with levels of soil  $\text{NH}_4$ , but a relationship with soil chemistry was reflected more strongly in saprotroph diversity, which was highly correlated with levels of  $\text{NH}_4$  as well as with  $\text{NO}_3$ , P, K, Ca and pH. (Single-column fitting table.)

|            | Ectomycorrhizal       |              | Saprotrophic          |              |
|------------|-----------------------|--------------|-----------------------|--------------|
|            | Pearson's correlation | P            | Pearson's correlation | P            |
| Ammonium   | 0.330                 | <b>0.035</b> | 0.326                 | <b>0.035</b> |
| Nitrate    | -0.018                | 0.913        | 0.464                 | <b>0.002</b> |
| Phosphorus | 0.041                 | 0.799        | 0.422                 | <b>0.005</b> |
| Potassium  | 0.186                 | 0.243        | 0.511                 | <b>0.001</b> |
| pH level   | -0.236                | 0.138        | 0.299                 | 0.055        |
| Calcium    | -0.137                | 0.393        | 0.388                 | <b>0.011</b> |

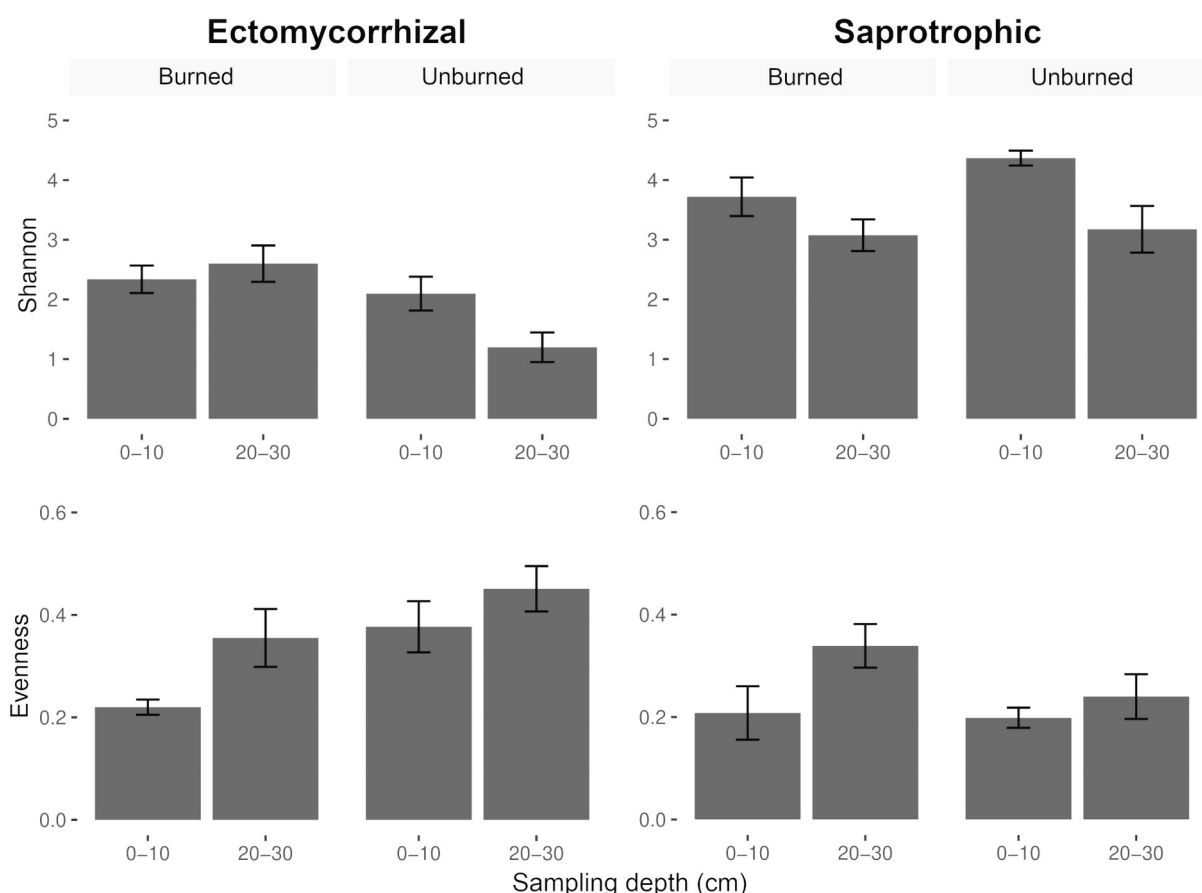

**Figure 2** Average Shannon's diversity values and Simpson's evenness (similarity of abundance between species) for EM and saprotrophic soil fungi at burned and unburned sites and at two sampling depths. Bars indicate standard error. In general, EM fungi were more diverse and less even at burned versus unburned sites, whereas saprotrophic communities were more diverse and less even at unburned sites. Average Shannon's diversity of EM fungi at unburned sites was lowest at deeper soil horizons, and EM communities at these sites had the highest average evenness values of all site types, indicating a late-successional community structure. (Single-column fitting image.)

### 3.4. Fungal diversity and community structure and effects of historical burning

Whether or not a site had been burned most influenced the community structure of saprotrophic fungi at both sampling depths, and of EM fungi at 20–30 cm below the soil surface (Table 4). The number of years that had elapsed since the most recent fire had most influence on EM community structure 0–10 cm below the surface ( $P=0.005$ ). Vegetation type was the second most important factor for EM fungi at 20–30 cm ( $P=0.011$ ). Saprotrophic soil fungi at 0–10 cm depth were secondarily influenced by vegetation type ( $P=0.010$ ). The influence of years since the most recent fire was marginally significant ( $P = 0.080$ ) at 20–30 cm depth. An interaction was

detected between vegetation type and the number of years since the most recent fire at 20–30 cm depth on the community structure of saprotrophic soil fungi ( $P=0.007$ ).

EM communities had higher average Shannon’s diversity indices and lower evenness at burned compared to unburned sites (*Figure 2*). Saprotrophic communities were more diverse and less even at unburned sites. Notably, the average Shannon’s diversity of EM fungi at unburned sites was lowest at deeper soil horizons (20-30 cm). EM communities at unburned sites had the highest average evenness values of all site types. NMDS of fungal community dissimilarity (Bray-Curtis) showed that samples clustered primarily according to burn status and depth (*Figure 4*). EM communities were more like each other at burned than at unburned sites. Soil saprotrophs were more similar at unburned sites than at burned sites.

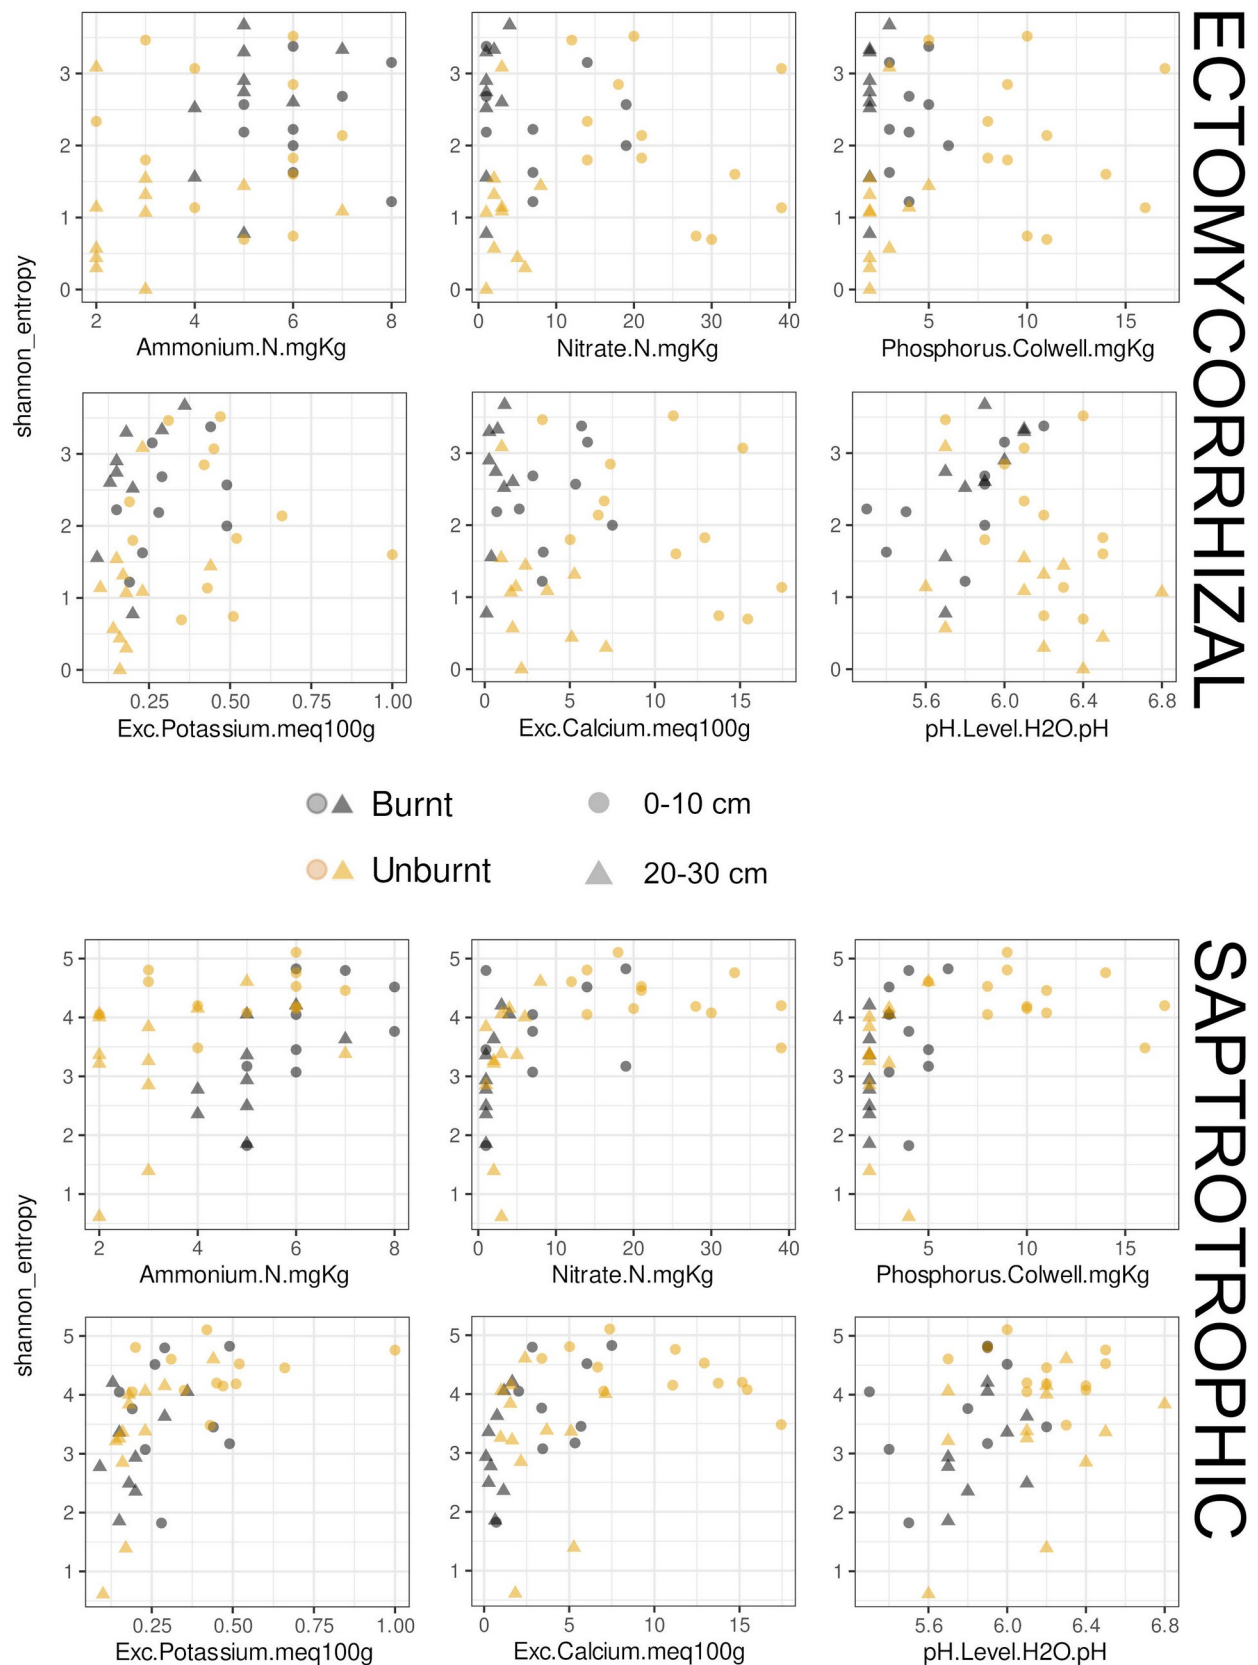

**Figure 3** Shannon's diversity (entropy) for ectomycorrhizal and saprotrophic soil fungi plotted against soil physical/chemical properties (levels of  $\text{NO}_3$ ,  $\text{NH}_4$ , P, K, Ca & pH) at burned and unburned sites and at two sampling depths. Lower diversity of EM communities at several unburned sites was associated with elevated soil nutrient levels relative to burned sites, however this trend was less evident for K levels. At unburned sites, saprotrophs at 0-10 cm depth were more diverse if  $\text{NO}_3$ , P, K and Ca were present at elevated levels, whereas at a depth of 20-30 cm saprotrophic diversity was more variable and levels of those nutrients were lower. (2-column fitting image. Color to be used in print.)

**Table 4** Results of PERMANOVA testing whether the burn status of a site (burned/unburned) and vegetation type (shrubland, grassy woodland, regenerating closed canopy forest, semi-deciduous notophyll forest, wet rainforest) were associated with changes in the community composition of ectomycorrhizal and saprotrophic soil fungi. Depth of sampling was a primary influence on community composition of EM (P=0.019) and saprotrophic (P=0.045) fungi, and datasets were split according to depth. All sites were included in the first analysis, as well as interactions between factors. Influence of years since most recent fire, years since cessation of frequent fires and interactions with vegetation type were subsequently analysed for burned sites only. P values <0.05 are shown in bold type. (2-column fitting table.)

|                 | Depth (cm) | Factor                                           | F model | R <sup>2</sup> | P     |
|-----------------|------------|--------------------------------------------------|---------|----------------|-------|
| Ectomycorrhizal | 0–10       | Years since most recent fire                     | 1.93    | 0.22           | 0.005 |
|                 |            | Burn status                                      | 1.32    | 0.07           | 0.046 |
|                 |            | Veg type                                         | 0.81    | 0.17           | 0.635 |
|                 |            | Burn status:Veg type                             | 0.73    | 0.20           | 0.797 |
|                 |            | Years since cessation of frequent fires          | 1.19    | 0.15           | 0.177 |
|                 |            | Years since most recent fire:Veg type            | 0.93    | 0.24           | 0.512 |
|                 | 20–30      | Burn status                                      | 1.37    | 0.07           | 0.007 |
|                 |            | Veg type                                         | 4.26    | 0.52           | 0.011 |
|                 |            | Burn status:Veg type                             | 3.32    | 0.53           | 0.019 |
|                 |            | Years since most recent fire                     | 1.01    | 0.13           | 0.552 |
|                 |            | Years since cessation of frequent fires          | 0.77    | 0.10           | 0.505 |
|                 |            | Years since cessation of frequent fires:Veg type | 5.99    | 0.67           | 0.027 |
| Saprotrophic    | 0–10       | Burn status                                      | 1.67    | 0.08           | 0.004 |
|                 |            | Veg type                                         | 2.19    | 0.35           | 0.010 |
|                 |            | Burn status:Veg type                             | 1.80    | 0.37           | 0.031 |
|                 |            | Years since most recent fire                     | 1.01    | 0.13           | 0.549 |
|                 |            | Years since cessation of frequent fires          | 0.95    | 0.12           | 0.507 |
|                 |            | Years since cessation of frequent fires:Veg type | 2.06    | 0.41           | 0.086 |
|                 | 20–30      | Burn status                                      | 1.39    | 0.07           | 0.046 |
|                 |            | Veg type                                         | 1.22    | 0.23           | 0.164 |
|                 |            | Burn status:Veg type                             | 1.01    | 0.25           | 0.239 |
|                 |            | Years since most recent fire                     | 3.28    | 0.32           | 0.080 |
|                 |            | Years since cessation of frequent fires          | 1.10    | 0.14           | 0.299 |
|                 |            | Years since most recent fire:Veg type            | 5.22    | 0.63           | 0.007 |

### 3.5. Abundance of specific fungal taxa at sites with contrasting nutrient profiles

Relationships were detected between the abundance of some EM OTUs and levels of soil nutrients (Figure 5). *Russula*<sup>3</sup>, *Pezizaceae*, *Pyronemataceae* and *Agaricales*<sup>5, 6</sup> were present in higher abundance in soil with elevated levels of N, P, K and Ca. *Entoloma* and *Tomentella* were associated with elevated pH, whereas *Sebacina*, *Chloridium* and *Thelephoraceae* 1 were associated with lower pH. Saprotrophic taxa associated with elevated N, P, K and Ca included *Bionectria*, *Leohumicola* and *Archaeorhizomyces* 6. Lower levels of these nutrients were

184 associated with *Geminibasidium* 1, 2 and 3 and Apiosporaceae. Increased pH was associated with  
185 the saprotrophic taxa *Clavaria*, *Idriella* and Phallaceae, and lower pH with *Hygrocybe*,  
186 *Sakaguchia*, *Chaetosphaeria* and Thelephoraceae 2.

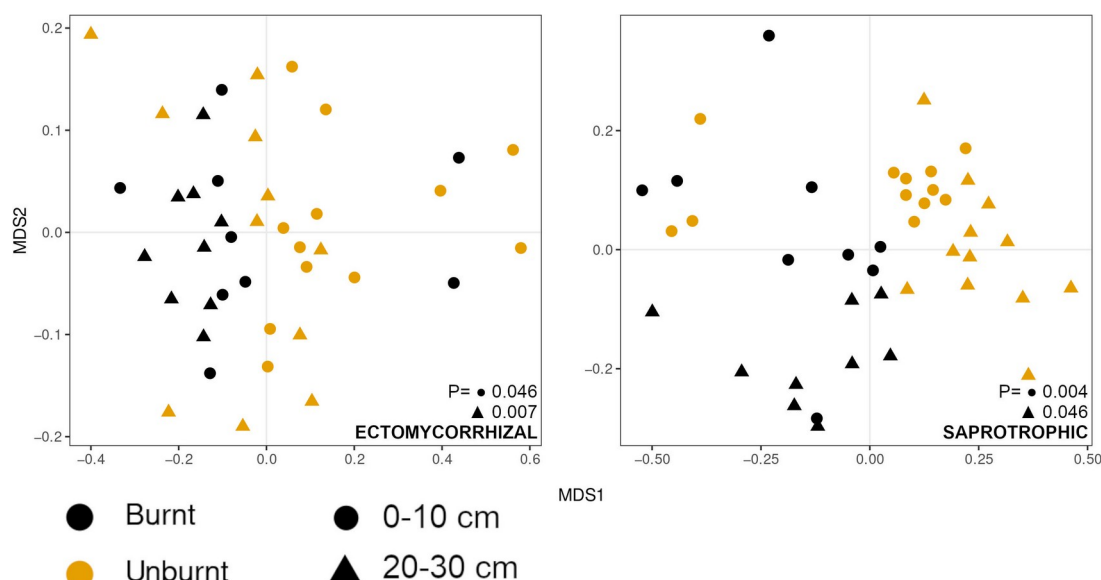

**Figure 4** Non-metric multidimensional scaling showing differences in fungal community composition between burned and unburned sites at two sampling depths for ectomycorrhizal and saprotrophic fungi. Matrix based on Bray-Curtis distances. *P* values refer to PERMANOVA test for significance in differences in taxonomic community structure between burned and unburned sites at each sampling depth. Samples clustered primarily according to burn status and depth. EM communities were more similar to each other at burned over unburned sites. Soil saprotrophs were more similar at unburned sites than at burned sites. (Single-column fitting image. Color to be used in print.)

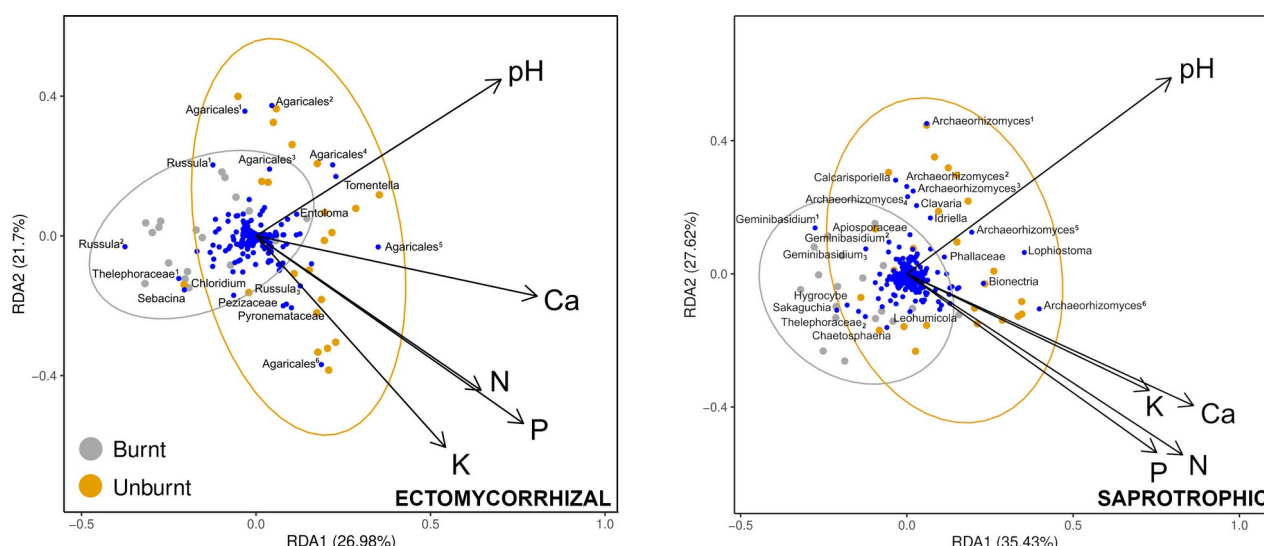

**Figure 5** Redundancy analysis (RDA) summarising variation in response variables (fungal community composition and individual taxa) and explanatory variables (soil chemical/physical properties) at burned and unburned sites. Blue dots represent individual fungal operational taxonomic units. Taxon and site dots appearing closer to arrow tips were associated with higher levels of that soil chemical/physical property, whereas taxon and site dots appearing opposite to an arrow were associated with lower levels. An angle of 90 degrees indicates little or no correlation. Based on Hellinger-transformed OTU tables to give lower weights to rare taxa. (2-column fitting image. Color to be used in print.)



### 3.6. *Abundance of specific fungal taxa at sites with contrasting fire histories*

We assigned ecological guild and trophic mode for 165 EM and 654 saprotrophic soil taxa from 1,696 assigned OTUs with FUNGuild v1.1 (Nguyen et al., 2016). The basidiomycete taxa *Russula*, *Hemileccinium*, *Lactifluus*, *Amanita*, *Mycosymbiodes* and Thelephoraceae were dominant at unburned sites and sites burned prior to 2015 (Figure 6). Ascomycota were present in increased abundance and taxonomic diversity, including *Meliniomyces* and the truffle taxon *Rhizoglyphus*, at sites burned immediately prior to sampling in 2017. Species richness of EM fungi decreased linearly from the time of last fire, from 72 OTUs at unburned sites to 12 at sites burned in 2014. The exceptions to this trend were sites that were most recently burned, which had 58 EM OTUs.

Species richness was at least twofold higher for saprotrophs over EM at all sites, and up to 6 times higher at unburned sites (Figure 6). Unburned sites were dominated by *Archaeorhizomyces* (Ascomycota) and *Hygrocybe* (Basidiomycota). Dominant saprotrophic taxa at burned sites included *Geminibasidium*, *Hygrocybe*, Thelephoraceae (Basidiomycota) and *Umbelopsis* and *Mycosymbiodes* (Ascomycota). A similar trend of decreased species richness from the time of last fire was also evident for saprotrophs, from 465 OTUs at unburned sites to 31 at sites burned in 2014, with 145 OTUs at sites that were most recently burned.

**Figure 6** (following page) Taxonomic composition and abundance of ectomycorrhizal (EM) and saprotrophic soil fungi at sites with different fire histories. Numbers inside circles in grey represent numbers of OTUs detected (species richness). Species richness of EM fungi decreased linearly from the time of last fire, from 72 OTUs at unburned sites to 12 at sites burned in 2014. (2-column fitting image. Color to be used in print.)

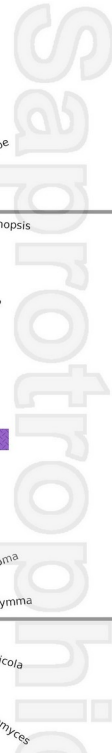

## 4. Discussion

Saprotrophic and EM fungi showed major community-level changes in response to fire, which interacted with and modified these functional guilds in different ways. Fire induced compositional changes in the dominant vegetation, which altered EM composition through the replacement of mycorrhizal hosts. The changes to EM composition were largely independent of alterations to soil chemistry. By contrast, the community composition, diversity and evenness of saprotrophic fungi changed after fire in response to reduced soil nutrient levels. We also detected fire-dependent shifts in the composition of saprotrophic fungi in litter at shallow soil horizons.

### 4.1. *Fire impacts ectomycorrhizal fungi by changing plant communities*

EM fungi are important tree symbionts in forest ecosystems. The taxonomic community composition and abundance of EM fungi differed between burned and unburned forest soils. EM fungi were strongly influenced by the dominant vegetation. In general, EM communities were less diverse and more even at unburned sites, which indicated a late-successional community structure dominated by a small number of taxa including *Russula* and *Amanita*. Successional shifts, in which EM community composition progresses from post-fire tree stand initiation to canopy closure, are well-documented (LeDuc et al., 2013; Longo et al., 2011).

The more recently a site had been burned, the lower the species richness of EM fungi, which was congruent with reports from temperate forests in the Northern Hemisphere (Kipfer et al., 2011; LeDuc et al., 2013; Rincón et al., 2014). An increase in EM species richness at sites burned immediately prior to sampling contrasts with other studies that showed immediate negative effects of fire on EM diversity. One explanation may be that ascomycete EM taxa were more diverse and abundant at burned sites relative to unburned sites. If fire had occurred the year prior to sampling, *Ruhlandiella* (hypogeous fungi, or truffles), which are dispersed primarily by mycophagous mammals (Claridge, 2002; Dundas et al., 2018), were the most abundant of this pyrophilic group. *Ruhlandiella* are known to fruit abundantly after bushfires (Kraisitudomsook et

al., 2019; Warcup, 1990). Reduction of undergrowth by fire also has the potential to increase mammalian access to the soil, which increases foraging and dispersal activity. Increased activity of pyrophilic taxa such as *Ruhlandiella* and those dispersed by mycophagous mammals may explain the short-term, post-fire increase in EM diversity.

#### 4.2. *Saprotrophic fungi are impacted by fire-driven nutrient shifts*

This study showed that forest fire alters the structure of saprotrophic communities primarily by changing nutrient levels in the soil and by altering the composition of the litter layer through changes in plant community composition. Saprotrophic fungi were more diverse and less even at unburned sites, where levels of soil nutrients were higher. Unlike EM fungi, saprotroph diversity was influenced by levels of all soil nutrients measured, including a weak yet measurable influence of pH. Strong positive correlations between diversity of saprotrophic fungi and the soil quality indicators N, P and  $\text{NH}_4$  have been reported (Chen et al., 2021), as well as increases in saprotrophic biomass and diversity in response to experimental addition of N to soils (Clocchiatti et al., 2020). In a global study, Ca was found to be the strongest predictor of soil fungal diversity (Tedersoo et al., 2014). In this study in the AMT, we found Ca,  $\text{NO}_3$ , P and K were strongly correlated with saprotroph diversity.

Soil saprotrophs showed marked changes in species richness in response to fire. In recently-burned areas, the species richness of soil saprotrophs was almost double that measured at most other burned sites. Fungal saprotrophs were dominated by *Geminibasidium* (Basidiomycota) and *Meliniomyces* (Ascomycota) in recently burned areas. We found higher species richness and Shannon's diversity of saprotrophic over EM fungi regardless of a site's fire history. Salo et al. (2019) described an increase in saprotrophic fungal diversity immediately after fire, with saprotrophic succession in soil more rapid than in wood. In Australian Mountain Ash forests, distinctive communities of soil fungi appeared in the year after fire disturbance, followed by much longer seral phases dominated by non-pyrophilic species (McMullan-Fisher et al., 2002). As

outlined by Verma and Jayakumar (2012), low-intensity fires in 2017 may have increased the amount of organic material available, leading to a rise in saprotrophic diversity.

The dominant vegetation type shaped saprotrophic communities in the litter soil horizon, which indicated that certain types of organic litter may favour some fungal taxa over others. Wu et al. (2011) found that leaf type was one of the main drivers of fungal community biomass and composition. Lunghini et al. (2013) reported higher fungal diversity in mixed litter than in monospecific litter. We propose that fire-induced alterations to plant community composition lead to compositional changes in the litter layer, which in turn select for particular communities of saprotrophic fungi.

### 4.3. *Soil chemistry was altered by fire*

Soil chemistry in the Iron Range has been altered by fire. Chemical/physical properties differed between burned and unburned sites and between the litter and mineral soil layers, with NO<sub>3</sub>, P, Ca and pH generally higher in unburned than at burned sites. This is congruent with current knowledge of fire-nutrient dynamics in tropical forests, where soil nutrients are depleted by recurrent fires (Bowman, 2009a). Conversely, occasional fires can cause a short-term increase in nutrient availability at shallow soil horizons via combustion of litter and soil organic matter. Low wind and high sub-canopy moisture generate fires of lower intensity in AMT forests than in savannas (Cochrane, 2003; Verma and Jayakumar, 2012). Vegetation changes can influence levels of soil nutrients, especially N (Evans et al., 2001; Zhou et al., 2018). We found a greater net effect of burning on soil chemical/physical properties, with no discernible patterns attributable to the different vegetation types studied. This suggests that alteration of nutrient profiles by fire has been direct, most likely through volatilization of litter and soil organic matter (Verma et al., 2019), rather than by indirect alterations to plant community composition.

We detected a strong correlation between levels of soil NH<sub>4</sub> and the diversity of EM fungi. There was no correlation between EM diversity and other soil chemical/physical properties

measured in this study. We propose that host availability and fire have a greater influence over rainforest EM community composition than levels of soil NO<sub>3</sub>, P, K, C, Ca and pH.

#### 4.4. *Different fungi at different depths*

Vertical partitioning of fungi as observed in this study applies broadly to EM-dominated soil ecosystems in tropical and boreal zones (McGuire et al., 2013). The type of vegetation structured EM communities in deep soil. The effect of vegetation type was weaker in the shallow litter layer, which is expected given the affiliation of EM fungi with tree roots. Primary notophyll rainforest in other areas of North Queensland has higher root biomass and root length compared to secondary forest (Hopkins et al., 1996). Deep soil horizons in unburned forests provide greater opportunity for EM colonisation of compatible hosts.

## 5. Conclusions

We support the hypothesis that tropical soil fungi are impacted by burning, which altered the abundance and phylogenetic structure of EM and saprotrophic communities in different ways. Communities of EM fungi were structurally altered by fire through vegetation changes at burned and unburned sites. Truffle-like taxa that are reliant on mycophagous mammals were more abundant at recently burned sites. In general, EM fungi at unburned sites had a late-successional community structure dominated by a small number of taxa. At burned sites EM diversity was higher and less even than at unburned sites. The diversity of saprotrophic fungi was impacted by reduced soil chemical/physical levels after fire. In the litter layer, the community composition of saprotrophs was influenced by changes in vegetation type.

Globally between 2007 and 2017, carbon sinks provided by terrestrial ecosystems removed an estimated 32 % of anthropogenic CO<sub>2</sub> emissions from the atmosphere (Le Quéré et al., 2018). Of these terrestrial sinks, tropical forests are some the largest due to their rapid growth (Keenan and Williams, 2018). Large savanna-dominated areas of Australia's tropical north could,



if protected from burning, support tropical forestry for carbon sequestration (K. Cook, pers. comm.), which may become a serious option for Australia as states begin to commit to net zero emissions (NSWDPIA, 2020). Any assessment of native tropical tree species for their utility in carbon forestry should consider their mycorrhizal symbionts and their tractability for the production of inoculum. Australia's tropical fungi have the potential to serve as a major biological resource over the approaching decades.

## **CRedit authorship contribution statement**

**Jed Calvert:** Conceptualization, Methodology, Formal analysis, Investigation, Writing - Original Draft, Visualization, Project administration. **Alistair McTaggart:** Conceptualization, Methodology, Writing - Review & Editing, Supervision. **Lilia C. Carvalhais:** Methodology, Formal analysis, Writing - Review & Editing. **André Drenth:** Writing - Review & Editing, Supervision. **Roger Shivas:** Writing - Review & Editing, Supervision.

## **Role of the funding source**

Keith Cook and the Maxim Foundation provided financial support for the conduct of this research and provided initial ideas for the study design as well as assistance in the collection of data. The funding source had no role in the analysis and interpretation of data, the writing of the report, or in the decision to submit the article for publication.

## **Research data for this article**

The dataset and metadata supporting this article is available in the BioPlatforms Australia project's data portal under the sample accessions 42144–42185 (<https://ccgapps.com.au/bpa-metadata/base>), doi:10.4227/71/561c9bc670099.

## 323 **Declaration of competing interest**

324 The authors declare that they have no known competing financial interests or personal  
325 relationships that could have appeared to influence the work reported in this paper.

## 326 **Acknowledgements**

327 The authors would like to acknowledge the Maxim Foundation for financial support for the  
328 project. We would also like to express our gratitude to Sofi Houghton for her design of the  
329 graphical abstract.

## 330 **References**

- 331 Abarenkov, K., Henrik Nilsson, R., Larsson, K.-H., Alexander, I.J., Eberhardt, U., Erland, S.,  
332 Høiland, K., Kjølner, R., Larsson, E., Pennanen, T., Sen, R., Taylor, A.F.S., Tedersoo, L.,  
333 Ursing, B.M., Vrålstad, T., Liimatainen, K., Peintner, U., Kõljalg, U., 2010. The UNITE  
334 database for molecular identification of fungi - recent updates and future perspectives. *New*  
335 *Phytol.* 186, 281–285. <https://doi.org/10.1111/j.1469-8137.2009.03160.x>
- 336 Alem, D., Dejene, T., Oria-de-Rueda, J.A., Geml, J., Castaño, C., Smith, J.E., Martín-Pinto, P.,  
337 2020. Soil fungal communities and succession following wildfire in Ethiopian dry  
338 Afromontane forests, a highly diverse underexplored ecosystem. *For. Ecol. Manage.* 474,  
339 118328. <https://doi.org/10.1016/j.foreco.2020.118328>
- 340 Baldrian, P., 2019. The known and the unknown in soil microbial ecology. *FEMS Microbiol. Ecol.*  
341 95, 1–9. <https://doi.org/10.1093/femsec/fiz005>
- 342 Beck, M., 2017. ggord: Ordination Plots with ggplot2.
- 343 Bengtsson-Palme, J., Ryberg, M., Hartmann, M., Branco, S., Wang, Z., Godhe, A., De Wit, P.,  
344 Sánchez-García, M., Ebersberger, I., de Sousa, F., Amend, A.S., Jumpponen, A., Unterseher,  
345 M., Kristiansson, E., Abarenkov, K., Bertrand, Y.J.K., Sanli, K., Eriksson, K.M., Vik, U.,  
346 Veldre, V., Nilsson, R.H., 2013. Improved software detection and extraction of ITS1 and  
347 ITS2 from ribosomal ITS sequences of fungi and other eukaryotes for analysis of  
348 environmental sequencing data. *Methods Ecol. Evol.* 4, n/a-n/a. [https://doi.org/10.1111/2041-](https://doi.org/10.1111/2041-210X.12073)  
349 [210X.12073](https://doi.org/10.1111/2041-210X.12073)
- 350 Bissett, A., Fitzgerald, A., Meintjes, T., Mele, P.M., Reith, F., Dennis, P.G., Breed, M.F., Brown,  
351 B., Brown, M. V., Brugger, J., Byrne, M., Caddy-Retalic, S., Carmody, B., Coates, D.J.,  
352 Correa, C., Ferrari, B.C., Gupta, V.V.S.R., Hamonts, K., Haslem, A., Hugenholtz, P., Karan,  
353 M., Koval, J., Lowe, A.J., Macdonald, S., McGrath, L., Martin, D., Morgan, M., North, K.I.,

- Paungfoo-Lonhienne, C., Pendall, E., Phillips, L., Pirzl, R., Powell, J.R., Ragan, M.A., Schmidt, S., Seymour, N., Snape, I., Stephen, J.R., Stevens, M., Tinning, M., Williams, K., Yeoh, Y.K., Zammit, C.M., Young, A., 2016. Introducing BASE: The Biomes of Australian Soil Environments soil microbial diversity database. *Gigascience* 5. <https://doi.org/10.1186/s13742-016-0126-5>
- Bolyen, E., Rideout, J.R., Dillon, M.R., Bokulich, N.A., Abnet, C., Al-Ghalith, G.A., Alexander, H., Alm, E.J., Arumugam, M., Asnicar, F., Bai, Y., Bisanz, J.E., Bittinger, K., Brejnrod, A., Brislawn, C.J., Brown, C.T., Callahan, B.J., Caraballo-Rodríguez, A.M., Chase, J., Cope, E., Silva, R. Da, Dorrestein, P.C., Douglas, G.M., Durall, D.M., Duvallet, C., Edwardson, C.F., Ernst, M., Estaki, M., Fouquier, J., Gauglitz, J.M., Gibson, D.L., Gonzalez, A., Gorlick, K., Guo, J., Hillmann, B., Holmes, S., Holste, H., Huttenhower, C., Huttley, G., Janssen, S., Jarmusch, A.K., Jiang, L., Kaehler, B., Kang, K. Bin, Keefe, C.R., Keim, P., Kelley, S.T., Knights, D., Koester, I., Kosciulek, T., Kreps, J., Langille, M.G., Lee, J., Ley, R., Liu, Y.-X., Loftfield, E., Lozupone, C., Maher, M., Marotz, C., Martin, B.D., McDonald, D., McIver, L.J., Melnik, A. V, Metcalf, J.L., Morgan, S.C., Morton, J., Naimey, A.T., Navas-Molina, J.A., Nothias, L.F., Orchanian, S.B., Pearson, T., Peoples, S.L., Petras, D., Preuss, M.L., Priesse, E., Rasmussen, L.B., Rivers, A., Michael S Robeson, I., Rosenthal, P., Segata, N., Shaffer, M., Shiffer, A., Sinha, R., Song, S.J., Spear, J.R., Swafford, A.D., Thompson, L.R., Torres, P.J., Trinh, P., Tripathi, A., Turnbaugh, P.J., Ul-Hasan, S., Hooft, J.J. van der, Vargas, F., Vázquez-Baeza, Y., Vogtmann, E., Hippel, M. von, Walters, W., Wan, Y., Wang, M., Warren, J., Weber, K.C., Williamson, C.H., Willis, A.D., Xu, Z.Z., Zaneveld, J.R., Zhang, Y., Knight, R., Caporaso, J.G., 2018. QIIME 2: Reproducible, interactive, scalable, and extensible microbiome data science. <https://doi.org/10.7287/peerj.preprints.27295v1>
- Bowman, D., 2009. The fire theory II. Fire, nutrient cycling, and topography. *Aust. Rainforests* 185–195. <https://doi.org/10.1017/cbo9780511583490.010>
- Bowman, D., Brown, G., Braby, M., Brown, J., Cook, L., Crisp, M., Ford, F., Haberle, S., Hughes, J., Isagi, Y., Joseph, L., McBride, J., Nelson, G., Ladiges, P., 2010. Biogeography of the Australian monsoon tropics. *J. Biogeogr.* 37, 201–216.
- Bowman, D.M.J.S., 2009. The fire theory IV. Aboriginal landscape burning, Australian Rainforests. <https://doi.org/10.1017/cbo9780511583490.012>
- Bray, J.R., Curtis, J.T., 1957. An Ordination of the Upland Forest Communities of Southern Wisconsin. *Ecol. Monogr.* 27, 325–349. <https://doi.org/10.2307/1942268>
- Certini, G., Moya, D., Lucas-Borja, M.E., Mastrolonardo, G., 2021. The impact of fire on soil-dwelling biota: A review. *For. Ecol. Manage.* 488, 118989. <https://doi.org/10.1016/j.foreco.2021.118989>
- Chen, L., Xiang, W., Ouyang, S., Wu, H., Xia, Q., Ma, J., Zeng, Y., Lei, P., Xiao, W., Li, S., Kuzyakov, Y., 2021. Tight coupling of fungal community composition with soil quality in a Chinese fir plantation chronosequence. *L. Degrad. Dev.* 32, 1164–1178. <https://doi.org/10.1002/ldr.3771>

- 393 Claridge, A.W., 2002. Ecological role of hypogeous ectomycorrhizal fungi in Australian forests  
394 and woodlands Author ( s): Andrew W . Claridge Source : Plant and Soil , July ( I ) 2002 ,  
395 Vol . 244 , No . 1 / 2 , DIVERSITY AND INTEGRATION IN MYCORRHIZAS  
396 ( Proceedings of the 3rd 244, 291–305.
- 397 Clocchiatti, A., Hannula, S.E., van den Berg, M., Korthals, G., de Boer, W., 2020. The hidden  
398 potential of saprotrophic fungi in arable soil: Patterns of short-term stimulation by organic  
399 amendments. *Appl. Soil Ecol.* 147, 103434. <https://doi.org/10.1016/j.apsoil.2019.103434>
- 400 Cochrane, M., 2003. Fire science for rainforests. *Nature* 421, 913–919.  
401 <https://doi.org/10.1038/nature01437>
- 402 Cole, L.E.S., Bhagwat, S.A., Willis, K.J., 2014. Recovery and resilience of tropical forests after  
403 disturbance. *Nat. Commun.* 5, 1–7. <https://doi.org/10.1038/ncomms4906>
- 404 Cook, K., 2020. Potential for tropical carbon forestry in the Australian Monsoon Tropics, Personal  
405 communication.
- 406 Crowther, T.W., Todd-Brown, K.E.O., Rowe, C.W., Wieder, W.R., Carey, J.C., MacHmuller, M.B.,  
407 Snoek, B.L., Fang, S., Zhou, G., Allison, S.D., Blair, J.M., Bridgham, S.D., Burton, A.J.,  
408 Carrillo, Y., Reich, P.B., Clark, J.S., Classen, A.T., Dijkstra, F.A., Elberling, B., Emmett,  
409 B.A., Estiarte, M., Frey, S.D., Guo, J., Harte, J., Jiang, L., Johnson, B.R., Kroël-Dulay, G.,  
410 Larsen, K.S., Laudon, H., Lavalley, J.M., Luo, Y., Lupascu, M., Ma, L.N., Marhan, S.,  
411 Michelsen, A., Mohan, J., Niu, S., Pendall, E., Peñuelas, J., Pfeifer-Meister, L., Poll, C.,  
412 Reinsch, S., Reynolds, L.L., Schmidt, I.K., Sistla, S., Sokol, N.W., Templer, P.H., Treseder,  
413 K.K., Welker, J.M., Bradford, M.A., 2016. Quantifying global soil carbon losses in response  
414 to warming. *Nature* 540, 104–108. <https://doi.org/10.1038/nature20150>
- 415 Decaëns, T., Ecology, S.G., May, N., 2010. Macroecological patterns in soil communities Linked  
416 references are available on JSTOR for this article : Macroecological patterns in soil  
417 communities. *Glob. Ecol. Biogeogr.* 19, 287–302.
- 418 Dundas, S.J., Hopkins, A.J.M., Ruthrof, K.X., Tay, N.E., Burgess, T.I., Hardy, G.E.S.J., Fleming,  
419 P.A., 2018. Digging mammals contribute to rhizosphere fungal community composition and  
420 seedling growth. *Biodivers. Conserv.* 27, 3071–3086. [https://doi.org/10.1007/s10531-018-](https://doi.org/10.1007/s10531-018-1575-1)  
421 1575-1
- 422 Ettema, C.H., Wardle, D.A., 2002. Spatial soil ecology. *Trends Ecol. Evol.*  
423 [https://doi.org/10.1016/S0169-5347\(02\)02496-5](https://doi.org/10.1016/S0169-5347(02)02496-5)
- 424 Evans, R., Rimer, R., Sperry, L., Belnap, J., 2001. Exotic Plant Invasion Alters Nitrogen  
425 Dynamics in an Arid Grassland. *Ecol. Appl.* 11, 1301–1310.
- 426 Fernandez, C.W., Kennedy, P.G., 2016. Revisiting the “Gadgil effect”: Do interguild fungal  
427 interactions control carbon cycling in forest soils? *New Phytol.* 209, 1382–1394.  
428 <https://doi.org/10.1111/nph.13648>
- 429 Gadgil, R.L., Gadgil, P.D., 1975. Suppression of litter decomposition by mycorrhizal roots of  
430 *Pinus radiata*. *New Zeal. J. For. Sci.* 5, 33–41.

- 431 Gadgil, R.L., Gadgil, P.D., 1971. Mycorrhiza and litter decomposition. *Nature* 233, 133.
- 432 <https://doi.org/10.1038/233133a0>
- 433 Gardes, M., Bruns, T.D., 1993. ITS primers with enhanced specificity for basidiomycetes -
- 434 application to the identification of mycorrhizae and rusts. *Mol. Ecol.* 2, 113–118.
- 435 <https://doi.org/10.1111/j.1365-294X.1993.tb00005.x>
- 436 Hågvar, S., 1998. The relevance of the Rio-Convention on biodiversity to conserving the
- 437 biodiversity of soils. *Appl. Soil Ecol.* 9, 1–7. [https://doi.org/10.1016/S0929-1393\(98\)00115-2](https://doi.org/10.1016/S0929-1393(98)00115-2)
- 438 Harrell, F., 2021. Hmisc R package.
- 439 Hopkins, M.S., Reddell, P., Hewett, R.K., Graham, A.W., 1996. Comparison of root and
- 440 mycorrhizal characteristics in primary and secondary rainforest on a metamorphic soil in
- 441 North Queensland, Australia. *J. Trop. Ecol.* 12, 871–885.
- 442 <https://doi.org/10.1017/S0266467400010130>
- 443 Hubnerova, Z., Esterby, S., Taylor, S., 2020. Fire-Weather Index and Climate Change, in:
- 444 Evaluating Climate Change Impacts. Chapman and Hall/CRC, pp. 45–63.
- 445 <https://doi.org/10.1201/9781351190831-3>
- 446 Keenan, T.F., Williams, C.A., 2018. The Terrestrial Carbon Sink. *Annu. Rev. Environ. Resour* 43,
- 447 219–243. <https://doi.org/10.1146/annurev-environ>
- 448 Kipfer, T., Moser, B., Egli, S., Wohlgemuth, T., Ghazoul, J., 2011. Ectomycorrhiza succession
- 449 patterns in *Pinus sylvestris* forests after stand-replacing fire in the Central Alps. *Oecologia*
- 450 167, 219–228. <https://doi.org/10.1007/s00442-011-1981-5>
- 451 Kraisitudomsook, N., Healy, R.A., Mujic, A.B., Pfister, D.H., Nouhra, E.R., Smith, M.E., 2019.
- 452 Systematic study of truffles in the genus *Ruhlandiella*, with the description of two new
- 453 species from Patagonia. *Mycologia* 111, 477–492.
- 454 <https://doi.org/10.1080/00275514.2019.1574490>
- 455 Le Quéré, C., Andrew, R.M., Friedlingstein, P., Sitch, S., Pongratz, J., Manning, A.C.,
- 456 Korsbakken, J.I., Peters, G.P., Canadell, J.G., Jackson, R.B., Boden, T.A., Tans, P.P.,
- 457 Andrews, O.D., Arora, V.K., Bakker, D.C.E., Barbero, L., Becker, M., Betts, R.A., Bopp, L.,
- 458 Chevallier, F., Chini, L.P., Ciais, P., Cosca, C.E., Cross, J., Currie, K., Gasser, T., Harris, I.,
- 459 Hauck, J., Haverd, V., Houghton, R.A., Hunt, C.W., Hurtt, G., Ilyina, T., Jain, A.K., Kato, E.,
- 460 Kautz, M., Keeling, R.F., Klein Goldewijk, K., Körtzinger, A., Landschützer, P., Lefèvre, N.,
- 461 Lenton, A., Lienert, S., Lima, I., Lombardozzi, D., Metzl, N., Millero, F., Monteiro, P.M.S.,
- 462 Munro, D.R., Nabel, J.E.M.S., Nakaoka, S.-I., Nojiri, Y., Padin, X.A., Peregon, A., Pfeil, B.,
- 463 Pierrot, D., Poulter, B., Rehder, G., Reimer, J., Rödenbeck, C., Schwinger, J., Séférian, R.,
- 464 Skjelvan, I., Stocker, B.D., Tian, H., Tilbrook, B., Tubiello, F.N., Van Der Laan-Luijkx, I.T.,
- 465 Van Der Werf, G.R., Van Heuven, S., Viovy, N., Vuichard, N., Walker, A.P., Watson, A.J.,
- 466 Wiltshire, A.J., Zaehle, S., Zhu, D., 2018. Global Carbon Budget 2017. *Earth Syst. Sci. Data*
- 467 10, 405–448. <https://doi.org/10.5194/essd-10-405-2018>
- 468 LeDuc, S.D., Lilleskov, E.A., Horton, T.R., Rothstein, D.E., 2013. Ectomycorrhizal fungal
- 469 succession coincides with shifts in organic nitrogen availability and canopy closure in post-

470 wildfire jack pine forests. *Oecologia* 172, 257–269. <https://doi.org/10.1007/s00442-012->  
471 2471-0

472 Longo, S., Urcelay, C., Nouhra, E., 2011. Long term effects of fire on ectomycorrhizas and soil  
473 properties in *Nothofagus pumilio* forests in Argentina. *For. Ecol. Manage.* 262, 348–354.  
474 <https://doi.org/10.1016/j.foreco.2011.03.041>

475 Lozupone, C., Knight, R., 2005. UniFrac: a new phylogenetic method for comparing microbial  
476 communities. *Appl. Environ. Microbiol.* 71, 8228–35.  
477 <https://doi.org/10.1128/AEM.71.12.8228-8235.2005>

478 Lunghini, D., Granito, V.M., Di Lonardo, D.P., Maggi, O., Persiani, A.M., 2013. Fungal diversity  
479 of saprotrophic litter fungi in a Mediterranean maquis environment. *Mycologia* 105, 1499–  
480 1515. <https://doi.org/10.3852/13-103>

481 McGuire, K.L., Allison, S.D., Fierer, N., Treseder, K.K., 2013. Ectomycorrhizal-Dominated  
482 Boreal and Tropical Forests Have Distinct Fungal Communities, but Analogous Spatial  
483 Patterns across Soil Horizons. *PLoS One* 8, 1–9.  
484 <https://doi.org/10.1371/journal.pone.0068278>

485 McMullan-Fisher, S.J.M., May, T.W., Keane, P.J., 2002. The macrofungal community and fire in a  
486 Mountain Ash forest in southern Australia. *Fungal Divers.* 10, 57–76.

487 Neldner, V.J., Clarkson, J.R., 1995. Vegetation Survey and Mapping of Cape York Peninsula, Cape  
488 York Peninsula Land Use Strategy. Mareeba.

489 Nguyen, N.H., Song, Z., Bates, S.T., Branco, S., Tedersoo, L., Menke, J., Schilling, J.S., Kennedy,  
490 P.G., 2016. FUNGuild: An open annotation tool for parsing fungal community datasets by  
491 ecological guild. *Fungal Ecol.* 20, 241–248. <https://doi.org/10.1016/j.funeco.2015.06.006>

492 NSWDPPIA, 2020. Net Zero Plan Stage 1: 2020-2030 [WWW Document]. NSW Dep. Planning,  
493 Ind. Environ. URL <https://www.environment.nsw.gov.au/topics/climate-change/net-zero-plan>  
494 (accessed 5.12.21).

495 Oksanen, J., Blanchet, G., Friendly, M., Kindt, R., Legendre, P., McGlinn, D., Minchin, P.R.,  
496 O'Hara, R.B., Simpson, G.L., Solymos, P., Henry, M., Stevens, H., Szoecs, E., Wagner, H.,  
497 2020. vegan: Community Ecology Package [WWW Document]. R Packag. version 2.5-6.  
498 URL <https://cran.r-project.org/package=vegan>

499 Onde, S., Prior, L.D., Vigilante, T., Bowman, D.M.J.S., 2016. Post-fire resprouting strategies of  
500 rainforest and savanna saplings along the rainforest–savanna boundary in the Australian  
501 monsoon tropics. *Plant Ecol.* 217, 711–724. <https://doi.org/10.1007/s11258-015-0531-3>

502 Ondov, B.D., Bergman, N.H., Phillippy, A.M., 2011. Interactive metagenomic visualization in a  
503 Web browser. *BMC Bioinformatics* 385.

504 Owen, S.M., Patterson, A.M., Gehring, C.A., Sieg, C.H., Baggett, L.S., Fulé, P.Z., 2019. Large,  
505 high-severity burn patches limit fungal recovery 13 years after wildfire in a ponderosa pine  
506 forest. *Soil Biol. Biochem.* 139. <https://doi.org/10.1016/j.soilbio.2019.107616>



507 Pellegrini, A.F.A., Hedin, L.O., Stayer, A.C., Govender, N., 2019. Fire alters ecosystem carbon  
508 and nutrients but not plant nutrient stoichiometry or composition in tropical savanna Author (s): Adam F. A. Pellegrini, Lars O. Hedin, A. Carla Staver and Navashni Govender  
509 Published by: Wiley on behalf of the Ecolog 96, 1275–1285.

511 Rincón, A., Santamaría, B.P., Ocaña, L., Verdú, M., 2014. Structure and phylogenetic diversity of  
512 post-fire ectomycorrhizal communities of maritime pine. *Mycorrhiza* 24, 131–141.  
513 <https://doi.org/10.1007/s00572-013-0520-0>

514 Salo, K., Domisch, T., Kouki, J., 2019. Forest wildfire and 12 years of post-disturbance  
515 succession of saprotrophic macrofungi (Basidiomycota, Ascomycota). *For. Ecol. Manage.*  
516 451, 117454. <https://doi.org/10.1016/j.foreco.2019.117454>

517 Sarmiento, C., Zalamea, P.-C., Dalling, J.W., Davis, A.S., Stump, S.M., U'Ren, J.M., Arnold,  
518 A.E., 2017. Soilborne fungi have host affinity and host-specific effects on seed germination  
519 and survival in a lowland tropical forest. *Proc. Natl. Acad. Sci.* 114, 201706324.  
520 <https://doi.org/10.1073/pnas.1706324114>

521 Shannon, C.E., 1948. A Mathematical Theory of Communication. *Bell Syst. Tech. J.* 27, 379–423.  
522 <https://doi.org/10.1002/j.1538-7305.1948.tb01338.x>

523 Silvério, D. V., Brando, P.M., Bustamante, M.M.C., Putz, F.E., Marra, D.M., Levick, S.R.,  
524 Trumbore, S.E., 2019. Fire, fragmentation, and windstorms: A recipe for tropical forest  
525 degradation. *J. Ecol.* 107, 656–667. <https://doi.org/10.1111/1365-2745.13076>

526 Singh, R.S., 1994. Changes in soil nutrients following burning of dry tropical savanna. *Int. J.*  
527 *Wildl. Fire* 4, 187–194. <https://doi.org/10.1071/WF9940187>

528 Team, R.C., 2020. R: A language and environment for statistical computing.

529 Tecon, R., Or, D., 2017. Biophysical processes supporting the diversity of microbial life in soil.  
530 *FEMS Microbiol. Rev.* 41, 599–623. <https://doi.org/10.1093/femsre/fux039>

531 Tedersoo, L., Bahram, M., Pölme, S., Kõljalg, U., Yorou, N., Wijesundera, R., Ruiz, L.V., Vasco-  
532 Palacios, A., Thu, P.Q., Suija, A., Smith, M., Sharp, C., Saluveer, E., Saitta, A., Rosas, M.,  
533 Riit, T., Ratkowsky, D., Pritsch, K., Põldmaa, K., Piepenbring, M., Phosri, C., Peterson, M.,  
534 Parts, K., Pärtel, K., Otsing, E., Nouhra, E., Njouonkou, A., Nilsson, R.H., Morgado, L.,  
535 Mayor, J., May, T., Majuakim, L., Lodge, J., Lee, S.S., Larsson, K.-H., Kohout, P., Hosaka,  
536 K., Hiiesalu, I., Henkel, T., Harend, H., Guo, L., Greslebin, A., Grelet, G., Geml, J., Gates,  
537 G., Dunstan, W., Dunk, C., Drenkhan, R., Dearnaley, J., Kesel, A. De, Dang, T., Chen, X.,  
538 Buegger, F., Brearley, F., Bonito, G., Anslan, S., Abell, S., Abarenkov, K., 2014.  
539 Disentangling global soil fungal diversity. *Science* (80-. ). 346, 1052–1053.  
540 <https://doi.org/10.1126/science.aaa1185>

541 Verma, S., Jayakumar, S., 2018. Effect of recurrent fires on soil nutrient dynamics in a tropical dry  
542 deciduous forest of Western Ghats, India. *J. Sustain. For.* 37, 678–690.  
543 <https://doi.org/10.1080/10549811.2018.1453842>

544 Verma, S., Jayakumar, S., 2012. Impact of forest fire on physical, chemical and biological  
545 properties of soil: A review. *Proc. Int. Acad. Ecol. Environ. Sci.* 2, 168–176.

546 Verma, S., Singh, D., Singh, A.K., Jayakumar, S., 2019. Post-fire soil nutrient dynamics in a  
547 tropical dry deciduous forest of Western Ghats, India. *For. Ecosyst.* 6.  
548 <https://doi.org/10.1186/s40663-019-0168-0>

549 Warcup, J., 1990. Occurrence of ectomycorrhizal and saprophytic discomycetes after a wild fire in  
550 a eucalypt forest. *Mycol. Res.* 94, 1065–1069. [https://doi.org/10.1016/S0953-](https://doi.org/10.1016/S0953-7562(09)81334-8)  
551 [7562\(09\)81334-8](https://doi.org/10.1016/S0953-7562(09)81334-8)

552 Webb, L.J., 1959. A Physiognomic Classification of Australian Rain Forests. *J. Ecol.* 47, 551.  
553 <https://doi.org/10.2307/2257290>

554 White, T., Bruns, T., Lee, S., Taylor, J., 1990. Amplification and direct sequencing of fungal  
555 ribosomal RNA genes for phylogenetics, PCR protocols: a guide to methods and  
556 applications.

557 Wu, L., Feinstein, L.M., Valverde-Barrantes, O., Kershner, M.W., Leff, L.G., Blackwood, C.B.,  
558 2011. Placing the Effects of Leaf Litter Diversity on Saprotrophic Microorganisms in the  
559 Context of Leaf Type and Habitat. *Microb. Ecol.* 61, 399–409.  
560 <https://doi.org/10.1007/s00248-010-9760-0>

561 Zhou, Y., Mushinski, R.M., Hyodo, A., Ben Wu, X., Boutton, T.W., 2018. Vegetation change alters  
562 soil profile  $\delta^{15}\text{N}$  values at the landscape scale. *Soil Biol. Biochem.* 119, 110–120.  
563 <https://doi.org/10.1016/j.soilbio.2018.01.012>
